# Supplementary material for: Theoretical study of covalent organic frameworks and heterojunctions for the oxygen reduction reaction
Source: Royal Society of Chemistry journal article supplement (doi:10.1039/d4cp02749c), 2024-01-01
Supplement: d4cp02749c3.pdf [file d4cp02749c3.pdf]

## Supplementary Information for

### Theoretical study of covalent organic frameworks and heterojunctions for oxygen reduction reaction

Xiao-Xiao Guo<sup>a</sup>, Jing-Hua Guo<sup>\*,a</sup>, Dong Hou<sup>a</sup> and Gang Chen<sup>\*b</sup>

<sup>a</sup>Laboratory of Advanced Materials Physics and Nanodevices, School of Physics and Technology, University of Jinan, Jinan, Shandong 250022, China.

<sup>b</sup>School of Physics and Electronics, Shandong Normal University, Jinan, Shandong 250358, China.

#### 1. Computational details of the adsorption free energies

In the four-electron reduction pathway of ORR, the intermediates include  $*O_2$ ,  $*OOH$ ,  $*OH$ , and  $*O$ . The adsorption free energies ( $\Delta G_{\text{ads}}$ ) of these intermediates were calculated relative to  $H_2O$  and  $H_2$  under conditions of  $T = 298.15$  K and  $\text{pH} = 0$  (vs. SHE) according to equations<sup>1,2</sup>:

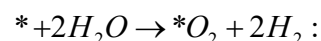

$$\Delta G_{*O_2} = G_{*O_2} + 2G_{H_2} - G_* - 2G_{H_2O} \quad (1)$$

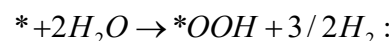

$$\Delta G_{*OOH} = G_{*OOH} + 3/2G_{H_2} - G_* - 2G_{H_2O} \quad (2)$$

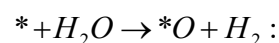

$$\Delta G_{*O} = G_{*O} + G_{H_2} - G_* - G_{H_2O} \quad (3)$$

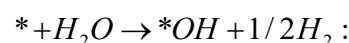

$$\Delta G_{*OH} = G_{*OH} + 1/2G_{H_2} - G_* - G_{H_2O} \quad (4)$$

where  $*$  represents the Fe-TCPP and Fe-(mIM)<sub>n</sub> ( $n=2-3$ ) adsorption sites. The  $G$  of each intermediate is calculated from the total DFT ground state energy ( $E_{\text{total}}$ ) corrected by the thermodynamic correction according to equation:

$$G = E_{\text{total}} + E_{\text{ZPE}} + \Delta H_{0 \rightarrow T} - TS \quad (5)$$

where  $E_{\text{ZPE}}$  is zero-point energy calculated from the DFT frequency analysis.  $\Delta H_{0 \rightarrow T}$  is defined as the enthalpy variation by temperature and calculated as  $\int_{0\text{K}}^{298\text{K}} C_p dT$  ( $C_p$  represents the heat capacities).  $S$  is the entropy at 298.15 K.

#### 2. Computational details of the reaction free energy

The reaction free energy ( $\Delta G$ ) of each ORR elemental step was calculated according to

equation:

$$\Delta G = \Delta\Delta G_{\text{ads}} + \Delta G_{\text{pH}} + \Delta G_{\text{U}} \quad (6)$$

where  $\Delta G$  of each ORR elemental step was calculated based on the computational hydrogen electrode (CHE) model developed by Nørskov et al.<sup>3</sup>.  $\Delta\Delta G_{\text{ads}}$  is the adsorption free energy variation between the reactants and products according to equations (1)-(4).  $\Delta G_{\text{pH}} = -kT\ln[\text{H}^+] = \text{pH} \cdot kT \cdot \ln 10$  is used to correct the free energy of  $\text{H}^+ + \text{e}^-$  referenced by a standard hydrogen electrode (SHE) at various pH values.  $\Delta G_{\text{U}} = -neU$  is the free energy change resulting from an extra applied potential  $U$  vs. SHE.

The theoretical ORR overpotentials ( $\eta_{\text{ORR}}$ , vs. SHE) associated with different active sites were calculated according to equation

$$\eta_{\text{ORR}} = 1.23 \text{ V} + \Delta G_{\text{max}}/e \quad (7)$$

where 1.23 V is defined as the equilibrium potential of the overall 4-electron ORR at the standard state and  $\Delta G_{\text{max}}$  represents the most positive free energy variation associated with the proton-electron-transfer (PET) steps.

### 3. The total density of states (TDOS) of COFs

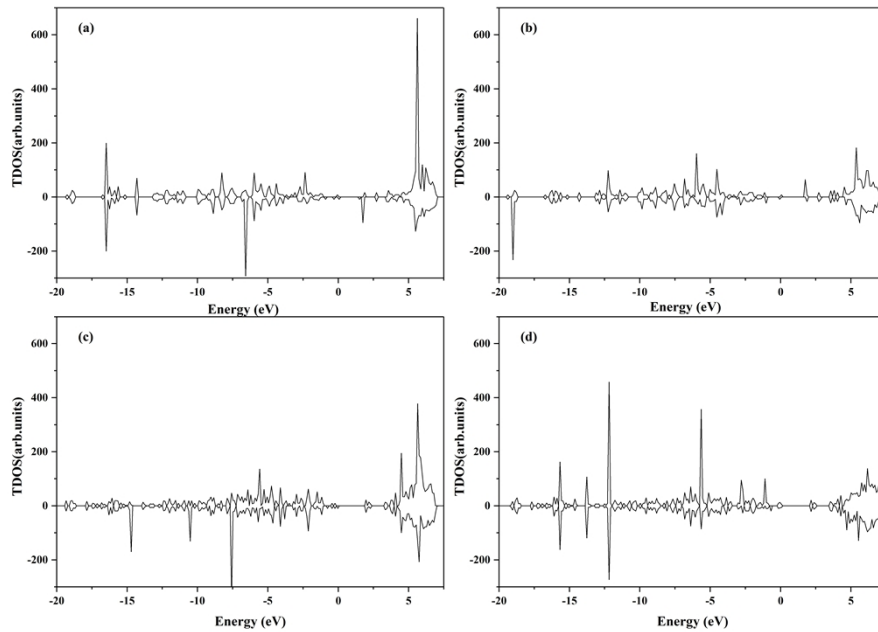

**Figure S1.** Total density of states (TDOS) of (a) Pc-PBBA COF\_Fe, (b) COF-366\_Fe, (c) Pc-PBBA COF\_Co and (d) COF-366\_Co structures.

### 4. Summary of the adsorption free energies and overpotential of the key intermediates of all materials

**Table S1.** Summary of adsorption free energy (eV) and overpotentials (V) of the key intermediates.

| Structures                                   | $\Delta G^*_{\text{O}}$ | $\Delta G^*_{\text{OO}}$ | $\Delta G^*$ | $\Delta G^*_{\text{O}}$ | $\eta^{\text{OR}}$ |
|----------------------------------------------|-------------------------|--------------------------|--------------|-------------------------|--------------------|
|                                              | 2                       | H                        | O            | H                       | R                  |
| Pc-PBBA COF_Fe                               | 4.49                    | 4.25                     | 1.75         | 1.02                    | 0.55               |
| COF-366_Fe                                   | 5.23                    | 4.35                     | 2.53         | 1.48                    | 0.69               |
| Pc-PBBA COF_Co                               | 4.70                    | 4.37                     | 2.89         | 1.52                    | 0.66               |
| COF-366_Co                                   | 4.39                    | 4.18                     | 2.65         | 1.15                    | 0.49               |
| Pc-PBBA COF_Fe@GP                            | 4.39                    | 3.99                     | 1.58         | 0.84                    | 0.49               |
| COF-366_Fe@GP                                | 4.47                    | 3.97                     | 1.54         | 0.87                    | 0.55               |
| Pc-PBBA COF_Co@GP                            | 4.62                    | 4.15                     | 2.67         | 1.25                    | 0.46               |
| COF-366_Co@GP                                | 4.49                    | 4.28                     | 2.68         | 1.36                    | 0.31               |
| Pc-PBBA COF_Fe@C <sub>3</sub> N <sub>4</sub> | 4.32                    | 4.20                     | 3.16         | 1.49                    | 0.51               |
| COF-366_Fe@C <sub>3</sub> N <sub>4</sub>     | 4.50                    | 4.11                     | 2.65         | 1.38                    | 0.42               |
| Pc-PBBA                                      | 4.37                    | 4.25                     | 3.30         | 1.46                    | 0.56               |
| COF_Co@C <sub>3</sub> N <sub>4</sub>         |                         |                          |              |                         |                    |
| COF-366_Co@C <sub>3</sub> N <sub>4</sub>     | 4.27                    | 4.10                     | 2.65         | 1.39                    | 0.41               |

## 5. Spin moments of the transition metal (Fe or Co) sites

Table S2. Spin moments ( $\mu_B$ ) of the transition metal (Fe or Co) sites.

| Structures                                  | Slab   | *O <sub>2</sub> | *OOH   | *O     | *OH   |
|---------------------------------------------|--------|-----------------|--------|--------|-------|
| Pc-PBBA COF_Fe                              | 2.015  | 2.501           | 2.169  | 1.426  | 1.006 |
| Pc-PBBA COF_Fe@GP                           | 2.011  | 1.438           | 2.517  | -1.401 | 2.599 |
| Pc-PBBACOF_Fe@C <sub>3</sub> N <sub>4</sub> | 2.023  | 1.240           | 2.530  | 1.282  | 2.605 |
| Pc-PBBA COF_Co                              | -1.020 | -0.880          | 1.437  | 0.409  | 1.300 |
| Pc-PBBA COF_Co@GP                           | -1.006 | 0.740           | -0.049 | 0.373  | 1.559 |
| Pc-PBBACOF_Co@C <sub>3</sub> N <sub>4</sub> | -1.046 | 0.691           | -1.263 | 0.485  | 1.505 |
| COF-366_Fe                                  | 2.024  | 2.068           | 2.271  | 1.269  | 2.438 |
| COF-366_Fe@GP                               | 2.025  | 1.309           | 1.086  | 1.489  | 2.674 |
| COF-366_Fe@C <sub>3</sub> N <sub>4</sub>    | 2.289  | 2.374           | -1.110 | 1.462  | 2.611 |
| COF-366_Co                                  | 2.656  | 0.382           | 0.063  | 2.367  | 0.006 |
| COF-366_Co@GP                               | -1.043 | -0.519          | 1.540  | 2.380  | 0.003 |
| COF-366_Co@C <sub>3</sub> N <sub>4</sub>    | 1.042  | 0.473           | 1.522  | 1.823  | 1.612 |

## REFERENCES

- 1 S. Wannakao, T. Maihom, K. Kongpatpanich, J. Limtrakul and V. Promarak, *Phys. Chem. Chem. Phys.*, 2017, **19**, 29540-29548.
- 2 W. Liang, J. Chen, Y. Liu and S. Chen, *ACS Catal.*, 2014, **4**, 4170-4177.
- 3 J. K. Nørskov, J. Rossmeisl, A. Logadottir, L. Lindqvist, J. R. Kitchin, T. Bligaard and H. Jónsson, *J. Phys. Chem. B*, 2004, **108**, 17886-17892.
